# Supplementary material for: Validation of the Korean Version of the Biological Rhythms Interview of Assessment in Neuropsychiatry
Source: PubMed Central journal article supplement — Psychiatry Investig. 2018 Dec 19;15(12):1115–20. doi: 10.30773/pi.2018.10.21.1 (PMC6318494; doi:10.30773/pi.2018.10.21.1), 2018-12-19
Supplement: pi-2018-10-21-1-suppl.pdf [file pi-2018-10-21-1-suppl.pdf]

## Supplementary Material

### 생물학적 리듬 평가 설문지 한국어판

(The Korean version of the Biological Rhythms Interview of Assessment in Neuropsychiatry, K-BRIAN)

아래의 질문에 지난 15일간의 당신의 상태에 가장 적절한 설명을 고르시오.

#### 수면

- 평소 자는 시간에 잠드는 것에 어려움이 있습니까? 얼마나 자주 있습니까?  
1. 전혀 없음      2. 드물게 있음      3. 때때로 있음      4. 흔히 있음
- 평소 기상시간대로 깨는데 문제가 있습니까? 얼마나 자주 있습니까?  
1. 전혀 없음      2. 드물게 있음      3. 때때로 있음      4. 흔히 있음
- 잠에서 깬 후에 잠자리에서 일어나 나오는데 어려움이 있습니까? 얼마나 자주 있습니까?  
1. 전혀 없음      2. 드물게 있음      3. 때때로 있음      4. 흔히 있음
- 당신의 평소 수면량으로 휴식을 취했다는 느낌(스스로 느끼는 안정감 및 운전, 업무와 같은 일상의 수행에서)을 받기 어렵습니까? 얼마나 자주 그렇습니까?  
1. 전혀 없음      2. 드물게 있음      3. 때때로 있음      4. 흔히 있음
- 당신은 휴식시간에 신경을 끄는 것에 어려움을 느끼셨나요? 얼마나 자주 그렇습니까?  
1. 전혀 없음      2. 드물게 있음      3. 때때로 있음      4. 흔히 있음

#### 활동

- 당신은 업무 시에 일을 처리하는데 어려움을 느끼시나요? 얼마나 자주 그렇습니까?  
1. 전혀 없음      2. 드물게 있음      3. 때때로 있음      4. 흔히 있음
- 당신은 집안일을 처리하는데 어려움을 겪으시나요? 얼마나 자주 그렇습니까?  
1. 전혀 없음      2. 드물게 있음      3. 때때로 있음      4. 흔히 있음
- 당신은 규칙적인 일상생활(예, 출근 버스, 지하철을 타거나 규칙적 운동)을 지키는데 어려움을 느끼시나요? 얼마나 자주 그렇습니까?  
1. 전혀 없음      2. 드물게 있음      3. 때때로 있음      4. 흔히 있음
- 당신은 정해진 시간의 일상 활동을 수행하는데 있어서 어려움을 느끼시나요? 얼마나 자주 그렇습니까?  
1. 전혀 없음      2. 드물게 있음      3. 때때로 있음      4. 흔히 있음
- 당신은 평소의 성욕이나 성적활동을 유지하는데 어려움을 느끼시나요? 얼마나 자주 그렇습니까?  
1. 전혀 없음      2. 드물게 있음      3. 때때로 있음      4. 흔히 있음

#### 사회적 활동

- 당신은 중요한 다른 사람과의 대인관계나 소통에 있어서 어려움을 느끼시나요? 얼마나 자주 그렇습니까?  
1. 전혀 없음      2. 드물게 있음      3. 때때로 있음      4. 흔히 있음
- 당신은 전자기기(TV, 인터넷 등)의 이용에 있어서 대인관계에 지장을 줄 정도로 과도하게 사용하시나요? 얼마나 자주 그렇습니까?  
1. 전혀 없음      2. 드물게 있음      3. 때때로 있음      4. 흔히 있음
- 당신의 일상과 수면패턴을 중요한 이들(가족, 친구, 배우자)과 맞추는데 어려움이 있으신가요? 얼마나 자주 그렇습니까?  
1. 전혀 없음      2. 드물게 있음      3. 때때로 있음      4. 흔히 있음
- 당신은 중요한 이들(가족, 친구, 배우자)에서 관심을 주는 것이 어려움이 있으신가요? 얼마나 자주 그렇습니까?  
1. 전혀 없음      2. 드물게 있음      3. 때때로 있음      4. 흔히 있음

#### 식사 패턴

- 당신은 규칙적인 식사시간을 시키는데 어려움이 있으신가요? 얼마나 자주 그렇습니까?  
1. 전혀 없음      2. 드물게 있음      3. 때때로 있음      4. 흔히 있음
- 식사를 거르시나요? 얼마나 자주 그렇습니까?  
1. 전혀 없음      2. 드물게 있음      3. 때때로 있음      4. 흔히 있음
- 당신은 식사량을 일정하게 유지하는 것에 어려움이 있으신가요? 얼마나 자주 그렇습니까?  
1. 전혀 없음      2. 드물게 있음      3. 때때로 있음      4. 흔히 있음
- 각성제(커피, 콜라, 초콜릿 등)의 과도하지 않게 사용하는 것에 어려움이 있으신가요? 얼마나 자주 그렇습니까?  
1. 전혀 없음      2. 드물게 있음      3. 때때로 있음      4. 흔히 있음

#### 시간형

다음 질문들은 지난 1년간에 관한 것입니다.

- 밤시간이 업무나 대인관계에 있어서 더 활발하다.  
1. 전혀 아니다      2. 거의 아니다      3. 보통 그렇다      4. 항상 그렇다
- 아침에 좀더 생산적이 되는 느낌이다.  
1. 전혀 아니다      2. 거의 아니다      3. 보통 그렇다      4. 항상 그렇다
- 낮 밤이 뒤바뀌어 살았나요?  
1. 전혀 아니다      2. 거의 아니다      3. 보통 그렇다      4. 항상 그렇다

Score

---
